# Supplementary material for: Stretchable elastomer composites with segregated filler networks: effect of carbon nanofiller dimensionality
Source: Royal Society of Chemistry journal article supplement (doi:10.1039/c9na00176j), 2019-01-01
Supplement: c9na00176j1.pdf [file c9na00176j1.pdf]

Supporting information

# Stretchable Elastomer Composites with Segregated Filler Network: Effect of Carbon Nanofiller Dimensionality

Kai Ke\*, Zhen Sang, Ica Manas-Zloczower\*

Department of Macromolecular Science and Engineering, Case Western Reserve

University, 2100 Adelbert Road, Cleveland, OH 44106-7202, United States

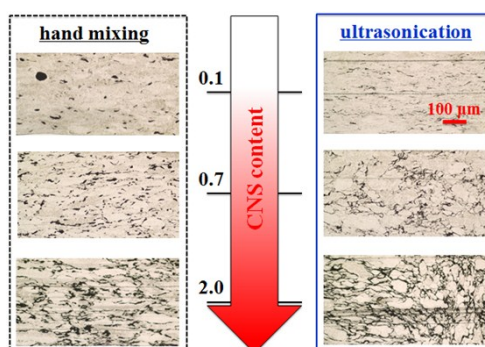

Fig. S1 Comparison of the morphology of TPU/CNS composites with segregated network structure prepared by hand mixing and ultrasonication of CNS.

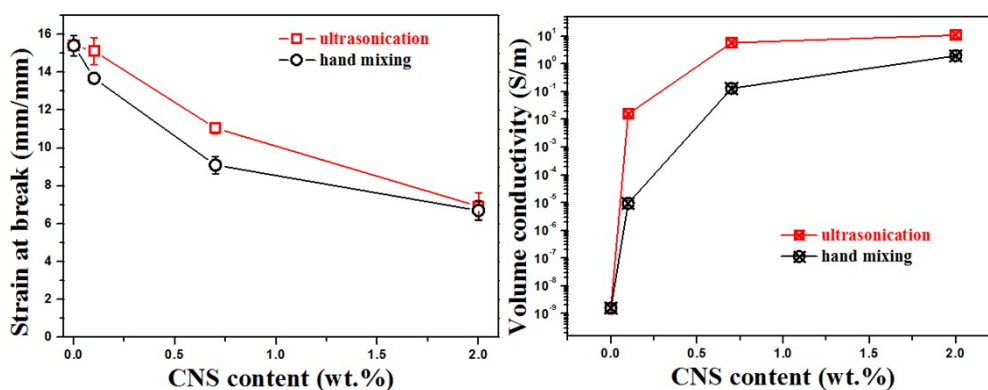

Fig. S2 Comparison of the strain at break and volume conductivity of TPU/CNS composites with a segregated network structure prepared by hand mixing and ultrasonication.

\* Corresponding authors: kxk424@case.edu (K. Ke), ixm@case.edu (I. Manas-Zloczower)
